# Supplementary material for: A Quick Guide to Genomics and Bioinformatics Training for Clinical and Public Audiences
Source: PLoS Comput Biol. 2014 Apr 10;10(4):e1003510. doi: 10.1371/journal.pcbi.1003510 (PMC3983038; doi:10.1371/journal.pcbi.1003510)
Supplement: Table S1 — Examples of genomics and bioinformatics coursework and continuing education programs for future and practicing clinical audiences. (XLSX) [file pcbi.1003510.s001.xlsx]

## Sheet: Sheet1
Programs for Future Clinicians:
Tufts undergraduate course offers future physicians introduction to bioinformatics skills, analysis methods, systems thinking, and simple computer scripting	http://www.cs.tufts.edu/comp/7/
Stanford School of Medicine offers a concentration area in 'Informatics and Data-Driven Medicine'	http://med.stanford.edu/bmiconcentration/
Mount Sinai School of Medicine offers first-ever course with whole-genome sequencing	http://icahn.mssm.edu/about-us/news-and-events/mount-sinai-school-of-medicine-offers-first-ever-course-with-whole-genome-sequencing
National Health Service has initiated a Modernizing Science Careers to establish new medical training programs in clinical informatics	http://www.networks.nhs.uk/nhs-networks/msc-framework-curricula/documents/STP%20MSc%20Clinical%20Bioinformatics%20-Genomics-%20Final%20Version%201%200%20for%202013%2014.pdf
Programs for Practicing Clinicians:
American Medical Informatics Association hosts continuing medical education courses in various informatics topics	http://www.amia.org/education/continuing-education-credit
